# Supplementary material for: Prognostic factors of lung abscess: A single-center retrospective cohort study
Source: Research Square preprint supplement (doi:10.21203/rs.3.rs-7499528/v1), 2025-09-03
Supplement: Supplementary file 2 [file 822e9c5cb41bc61d84c912e3.docx]

**Supplementary Materials**

**Supplemental Table 1.** Summary of empirical antimicrobial therapy

| **Antibiotic regimen** | **n** |
| --- | --- |
| Ampicillin/Sulbactam | 67 |
| Tazobactam/Piperacillin | 10 |
| Amoxicillin/Clavulanate + Ampicillin | 6 |
| Ceftriaxone | 6 |
| Cefditoren pivoxil | 3 |
| Cephalexin + Doxycycline | 2 |
| Tazobactam/Piperacillin + Vancomycin | 2 |
| Ampicillin + Doxycycline | 2 |
| Ampicillin/Sulbactam + Azithromycin | 1 |
| Ampicillin + Clindamycin | 1 |
| Ceftriaxone + Metronidazole | 1 |
| Amoxicillin/Clavulanate + Ampicillin + Azithromycin | 1 |
| Ceftriaxone + Garenoxacin | 1 |
| Meropenem | 1 |
| Cefotaxime | 1 |
| Clindamycin + Doripenem | 1 |
| Clindamycin + Levofloxacin | 1 |
| Cefditoren pivoxil + Clindamycin | 1 |
| Clindamycin | 1 |
